# Supplementary material for: Accessibility and conservation: General features of bacterial small RNA–mRNA interactions?
Source: PubMed Central journal article supplement — RNA Biol. 2012 Jul 1;9(7):954–65. doi: 10.4161/rna.20294 (PMC3495738; doi:10.4161/rna.20294), 2012-07-01
Supplement: rna-9-954-s01.pdf [file rna-9-954-s01.pdf]

Supplemental Material to:

Andreas Richter and Rolf Backofen. Accessibility and conservation: General features of bacterial small RNA-mRNA interactions? *RNA Biology* 2012; 9(7);

<http://dx.doi.org/10.4161/rna.20294>

<http://www.landesbioscience.com/journals/rnabiology/article/20294/>

## **Supplementary Material**

Accessibility and conservation - general features of bacterial  
small RNA-mRNA interactions?

Andreas S. Richter and Rolf Backofen

This supplement contains:

Supplementary Tables S1 to S3

Supplementary Figure S1

Supplementary References

## Supplementary Tables

**Table S1:** Dataset of interactions in *E. coli* used in this study. Target interaction site positions are given as distance to the annotated translation start site (TLS) and to the transcription start site (TSS) used in this study. Genes that are located within an operon are indicated. Interactions are given in bracket notation, where the '&' symbol concatenates the sRNA with its target, matching brackets represent base pairs between the two sequences and dots represent unpaired positions. 'Compens. mutations' indicates that the sRNA-target interaction was validated by the introduction of compensatory mutations in sRNA and target.

| sRNA | Target      | sRNA site | Target site<br>[TLS] [TSS] | Interaction                                           | Validation         | Ref. |
|------|-------------|-----------|----------------------------|-------------------------------------------------------|--------------------|------|
| ArcZ | <i>rpoS</i> | 66 – 91   | -120 – -99 / 449 – 470     | (((((((((.(((.((((.(((((&)))))))))))))))))))))        | compens. mutations | 20   |
| ChiX | <i>chbC</i> | 38 – 58   | -69 – -49 / [operon]       | (((((((((.(((.((((.(((((&)))))))))))))))))))))        | sRNA mutations     | 22   |
| ChiX | <i>chiP</i> | 45 – 56   | -19 – -8 / 52 – 63         | ((((((((((&))))))))))                                 | compens. mutations | 31   |
| ChiX | <i>dpiB</i> | 46 – 57   | -37 – -26 / 27 – 38        | ((((((((((&))))))))))                                 | compens. mutations | 19   |
| CyaR | <i>luxS</i> | 35 – 49   | -12 – 3 / 134 – 148        | (...((((((&))))))...)                                 | compens. mutations | 8    |
| CyaR | <i>nadE</i> | 35 – 49   | -11 – 3 / 20 – 33          | (...(((.(((((&))))))...)                              | compens. mutations | 8    |
| CyaR | <i>ompX</i> | 38 – 48   | -9 – 2 / 231 – 241         | (.(((((((&))))))...)                                  | compens. mutations | 8    |
| CyaR | <i>yqaE</i> | 31 – 50   | -4 – 16 / 54 – 73          | (.(.((((((.....(&.....))))))))...)                    | compens. mutations | 8    |
| DsrA | <i>hns</i>  | 31 – 43   | 7 – 19 / 43 – 55           | ((((((((((&))))))))))                                 | compens. mutations | 16   |
| DsrA | <i>rpoS</i> | 8 – 32    | -119 – -95 / 450 – 474     | (.(((((((((.(((.((((.(((((&)))))))))))))))))))))      | compens. mutations | 17   |
| FnrS | <i>folE</i> | 1 – 12    | -27 – -15 / 121 – 133      | (((((((((.(((((&))))...))))))                         | sRNA mutations     | 10   |
| FnrS | <i>folX</i> | 1 – 6     | -7 – -2 / 18 – 23          | ((((((&))))))                                         | sRNA mutations     | 10   |
| FnrS | <i>gpmA</i> | 38 – 57   | -13 – 4 / 75 – 91          | (((((((((.(((.((((.(((((&)))))))))))))))))))))        | compens. mutations | 10   |
| FnrS | <i>maeA</i> | 31 – 65   | -21 – 10 / 13 – 43         | (((.((((((.((((.((((.(((((&)))))))))))))))))))))      | compens. mutations | 10   |
| FnrS | <i>sodB</i> | 1 – 8     | 13 – 20 / 66 – 73          | ((((((((((&)))))))))                                  | compens. mutations | 10   |
| GcvB | <i>sstT</i> | 64 – 99   | -34 – 2 / 50 – 85          | (((.((((((.((((.((((.(((((&)))))))))))))))))))))      | compens. mutations | 30   |
| GlmZ | <i>glmS</i> | 150 – 169 | -40 – -22 / 118 – 136      | (((((((((.....(((.((((.(((((&)))))))))))))))))))))    | compens. mutations | 38   |
| MicA | <i>ompA</i> | 8 – 24    | -21 – -6 / 153 – 168       | (((((.((((((((&))))))))))))))                         | compens. mutations | 37   |
| MicA | <i>phoP</i> | 6 – 31    | -15 – 8 / 30 – 52          | (((((((((.((((.((((.(((((&)))))))))))))))))))))       | compens. mutations | 7    |
| MicC | <i>ompC</i> | 1 – 30    | -41 – -15 / 47 – 73        | ((((((((((((.(((.((((.(((((&))))))))))))))))))))))))) | compens. mutations | 6    |

2

(Continued)

| sRNA   | Target      | sRNA site           | Target site<br>[TLS] [TSS]              | Interaction                                                                              | Validation                                     | Ref.  |
|--------|-------------|---------------------|-----------------------------------------|------------------------------------------------------------------------------------------|------------------------------------------------|-------|
| MicF   | <i>ompF</i> | 1 – 33              | -16 – 10 / 95 – 120                     | (((((.....(((((((((((((&))))))))))))))))))                                               | <i>in vitro</i> probing                        | 34    |
| OmrA   | <i>cirA</i> | 2 – 24              | -35 – -10 / 126 – 151                   | (((((.....(((((((((((((&))))))))))))))))))                                               | compens. mutations                             | 13    |
| OmrA   | <i>csgD</i> | 2 – 20              | -79 – -61 / 69 – 87                     | (((((.....(((((((((((((&))))))))))))))))))                                               | compens. mutations                             | 14    |
| OmrA   | <i>ompR</i> | 1 – 19              | -29 – -11 / 134 – 152                   | (((((.....(((((((((((((&))))))))))))))))))                                               | compens. mutations                             | 13    |
| OmrA   | <i>ompT</i> | 1 – 33              | -12 – 20 / 20 – 51                      | (((((.....(((((((((((((&))))))))))))))))))                                               | compens. mutations                             | 13    |
| OmrB   | <i>cirA</i> | 2 – 24              | -35 – -10 / 126 – 151                   | (((((.....(((((((((((((&))))))))))))))))))                                               | compens. mutations                             | 13    |
| OmrB   | <i>csgD</i> | 2 – 20              | -79 – -61 / 69 – 87                     | (((((.....(((((((((((((&))))))))))))))))))                                               | compens. mutations                             | 14    |
| OmrB   | <i>ompR</i> | 1 – 19              | -29 – -11 / 134 – 152                   | (((((.....(((((((((((((&))))))))))))))))))                                               | compens. mutations                             | 13    |
| OmrB   | <i>ompT</i> | 1 – 32              | -12 – 20 / 20 – 51                      | (((((.....(((((((((((((&))))))))))))))))))                                               | compens. mutations                             | 13    |
| OxyS   | <i>fhfA</i> | 22 – 30<br>98 – 104 | 34 – 42 / 78 – 86<br>-15 – -9 / 30 – 36 | (((((.....(((((((((((((&))))))))))))))))))<br>(((((.....(((((((((((((&)))))))))))))))))) | compens. mutations                             | 1     |
| RprA   | <i>rpoS</i> | 33 – 62             | -117 – -94 / 452 – 475                  | (((((.....(((((((((((((&))))))))))))))))))                                               | compens. mutations                             | 18    |
| RyhB   | <i>cysE</i> | 34 – 46             | -4 – 9 / 116 – 128                      | (((((.....(((((((((((((&))))))))))))))))))                                               | compens. mutations                             | 33    |
| RyhB   | <i>fur</i>  | 38 – 76             | -96 – -47 / 84 – 133                    | (((((.....(((((((((((((&))))))))))))))))))                                               | compens. mutations                             | 39    |
| RyhB   | <i>iscS</i> | 40 – 68             | -26 – 3 / [operon]                      | (((((.....(((((((((((((&))))))))))))))))))                                               | <i>in vitro</i> probing                        | 9     |
| RyhB   | <i>shiA</i> | 44 – 55             | -59 – -48 / 19 – 30                     | (((((.....(((((((((((((&))))))))))))))))))                                               | compens. mutations                             | 28    |
| RyhB   | <i>sodB</i> | 38 – 46             | -4 – 5 / 50 – 58                        | (((((.....(((((((((((((&))))))))))))))))))                                               | <i>in vitro</i> probing                        | 12    |
| SgrS   | <i>manX</i> | 159 – 172           | 24 – 37 / 137 – 150                     | (((((.....(((((((((((((&))))))))))))))))))                                               | compens. mutations                             | 32    |
| SgrS   | <i>ptsG</i> | 168 – 187           | -28 – -9 / 213 – 232                    | (((((.....(((((((((((((&))))))))))))))))))                                               | compens. mutations,<br><i>in vitro</i> probing | 15,32 |
| Spot42 | <i>galK</i> | 20 – 61             | -19 – 21 / [operon]                     | (((((.....(((((((((((((&))))))))))))))))))                                               | <i>in vitro</i> probing                        | 21    |
| Spot42 | <i>gltA</i> | 4 – 13              | -131 – -122 / 310 – 319                 | (((((.....(((((((((((((&))))))))))))))))))                                               | sRNA mutations                                 | 3     |
| Spot42 | <i>nanC</i> | 1 – 17              | -33 – -16 / 395 – 412                   | (((((.....(((((((((((((&))))))))))))))))))                                               | compens. mutations                             | 3     |
| Spot42 | <i>srlA</i> | 20 – 34             | -15 – -1 / 90 – 104                     | (((((.....(((((((((((((&))))))))))))))))))                                               | compens. mutations                             | 3     |
| Spot42 | <i>sthA</i> | 48 – 55             | 15 – 22 / 47 – 54                       | (((((.....(((((((((((((&))))))))))))))))))                                               | compens. mutations                             | 3     |

3

Accessibility and conservation in sRNA-mRNA interactions

Richer and Backofen

(Continued)

| sRNA   | Target      | sRNA site | Target site<br>[TLS] [TSS] | Interaction                                                         | Validation     | Ref.         |
|--------|-------------|-----------|----------------------------|---------------------------------------------------------------------|----------------|--------------|
| Spot42 | <i>xytF</i> | 1 – 33    | 2 – 40 / 64 – 102          | ((((((((.....(((((((.....(((&<br>))))....))))))..))....))))..))..)) | sRNA mutations | <sup>3</sup> |

**Table S2:** Dataset of interactions in *Salmonella* used in this study. Target interaction site positions are given as distance to the annotated translation start site (TLS) and to the transcription start site (TSS) used in this study. Genes that are located within an operon are indicated. Interactions are given in bracket notation, where the '&' symbol concatenates the sRNA with its target, matching brackets represent base pairs between the two sequences and dots represent unpaired positions. 'Compens. mutations' indicates that the sRNA-target interaction was validated by the introduction of compensatory mutations in sRNA and target.

| sRNA | Target      | sRNA site | Target site<br>[TLS] [TSS] | Interaction                                       | Validation              | Ref. |
|------|-------------|-----------|----------------------------|---------------------------------------------------|-------------------------|------|
| ArcZ | <i>sdaC</i> | 62 – 71   | -13 – -3 / 67 – 77         | ((((((((((&)))))))))                              | compens. mutations      | 25   |
| ArcZ | STM3216     | 63 – 87   | -25 – -5 / 67 – 87         | (((((((((.(((....((((&)))))))))..))))))           | compens. mutations      | 25   |
| ArcZ | <i>tpx</i>  | 66 – 83   | 10 – 26 / 44 – 60          | ((((((....((((&))))....))))                       | compens. mutations      | 25   |
| ChiX | <i>chbC</i> | 35 – 55   | -66 – -46 / [operon]       | (((((((.((((((((&))))))))))..))))                 | mRNA mutations          | 11   |
| ChiX | <i>chiP</i> | 42 – 53   | -19 – -8 / 52 – 63         | ((((((((((&))))))))                               | compens. mutations      | 11   |
| CyaR | <i>ompX</i> | 35 – 66   | -30 – 3 / 210 – 242        | ((..(((((((.(((....(((..(((&)))..))))..))))..)))) | compens. mutations      | 24   |
|      |             |           |                            |                                                   | compens. mutations      | 24   |
| GcvB | <i>argT</i> | 75 – 91   | -57 – -42 / 90 – 105       | (((((((.((((((((&))))))))))))                     | <i>in vitro</i> probing | 35   |
| GcvB | <i>cycA</i> | 72 – 85   | -34 – -19 / 51 – 66        | (((((((((.(((&..))))))..))                        | <i>in vitro</i> probing | 36   |
|      |             | 138 – 161 | -24 – -8 / 61 – 77         | ((((((....((((((((&))))))))))))                   |                         |      |
| GcvB | <i>dppA</i> | 65 – 82   | -30 – -14 / 136 – 152      | (((((((.((((((((&))))))))))))                     | <i>in vitro</i> probing | 35   |
| GcvB | <i>gltI</i> | 65 – 76   | -38 – -27 / 70 – 81        | ((((((((((&))))))))                               | <i>in vitro</i> probing | 35   |
| GcvB | <i>livJ</i> | 63 – 87   | -51 – -28 / 54 – 77        | (((((((.(((.(((((((.((((&))))..))))))..))))       | <i>in vitro</i> probing | 35   |
| GcvB | <i>livK</i> | 65 – 77   | -29 – -17 / 370 – 382      | ((((((((((&))))))))                               | <i>in vitro</i> probing | 35   |
| GcvB | <i>oppA</i> | 65 – 89   | -8 – 16 / 505 – 528        | (((((((((.(((.((((((((&))))))))..))))))           | <i>in vitro</i> probing | 35   |
| GcvB | STM4351     | 69 – 79   | -54 – -43 / 12 – 23        | ((((((((((&))))))))                               | <i>in vitro</i> probing | 35   |
| InvR | <i>ompD</i> | 33 – 42   | 56 – 65 / 122 – 131        | ((((((((((&))))))))                               | <i>in vitro</i> probing | 27   |
| MicA | <i>lamB</i> | 8 – 36    | -9 – 18 / [operon]         | (((((((.(((.(((((((.((((&))))..))))))..))))       | compens. mutations      | 4    |
| MicC | <i>ompD</i> | 1 – 12    | 67 – 78 / 133 – 144        | ((((((((((&))))))))                               | compens. mutations      | 26   |
| RybB | <i>chiP</i> | 1 – 7     | 12 – 18 / 82 – 88          | ((((((&))))                                       | compens. mutations      | 2    |
| RybB | <i>fadL</i> | 1 – 8     | 49 – 56 / 150 – 157        | ((((((&))))                                       | compens. mutations      | 23   |
| RybB | <i>ompA</i> | 1 – 13    | 21 – 32 / 194 – 205        | (((((((.(((&..))))))                              | compens. mutations      | 23   |
| RybB | <i>ompC</i> | 1 – 10    | -50 – -41 / 38 – 47        | ((((((((((&))))))))                               | <i>in vitro</i> probing | 2,23 |
| RybB | <i>ompD</i> | 1 – 9     | 18 – 26 / 84 – 92          | ((((((((((&))))))))                               | compens. mutations      | 2,23 |
|      |             | 1 – 10    | 10 – 20 / 76 – 86          | ((((((((((&))))))))                               |                         |      |

(Continued)

| sRNA | Target      | sRNA site | Target site |          | Interaction                           | Validation           | Ref. |
|------|-------------|-----------|-------------|----------|---------------------------------------|----------------------|------|
|      |             |           | [TLS]       | [TSS]    |                                       |                      |      |
| RybB | <i>ompF</i> | 1 – 9     | -46 – -38 / | 67 – 75  | (((((((((&))))))))))                  | compens. mutations   | 23   |
| RybB | <i>ompN</i> | 1 – 16    | 5 – 20 /    | 80 – 95  | ((((.((((((((((((&)))))))))))))).)))) | compens. mutations   | 5    |
| RybB | <i>ompS</i> | 1 – 14    | 7 – 20 /    | 73 – 86  | ((((.(.(((((((((((&))))))))))))..)))) | sRNA deletion mutant | 23   |
| RybB | <i>ompW</i> | 1 – 13    | 3 – 20 /    | 32 – 49  | (((((((.(((((((&)))))).....))))))     | compens. mutations   | 23   |
| RybB | <i>tsx</i>  | 1 – 16    | -26 – -7 /  | 86 – 105 | (((((((.(((.(((((((&)))))).....)))))) | compens. mutations   | 23   |





(Continued)

| Organism          | sRNA   | mRNA        | sRNA site | mRNA site   | Predicted non-functional interaction | True target |
|-------------------|--------|-------------|-----------|-------------|--------------------------------------|-------------|
| <i>E. coli</i>    | OmrA   | <i>ygcO</i> | 64 – 82   | -41 – -23   | (((((.....(((.....)))))))))          | <i>csgD</i> |
| <i>E. coli</i>    | OmrB   | <i>hofC</i> | 36 – 54   | -59 – -41   | (((((.....(((.....)))))))))          | <i>ompR</i> |
| <i>E. coli</i>    | OmrB   | <i>mcbA</i> | 31 – 63   | -56 – -23   | (((((.....(((.....)))))))))          | <i>csgD</i> |
| <i>E. coli</i>    | OmrB   | <i>pyrB</i> | 35 – 57   | -146 – -121 | (((((.....(((.....)))))))))          | <i>cirA</i> |
| <i>E. coli</i>    | OmrB   | <i>yfdQ</i> | 35 – 66   | -85 – -54   | (((((.....(((.....)))))))))          | <i>ompT</i> |
| <i>E. coli</i>    | OxyS   | <i>apaH</i> | 7 – 13    | -30 – -24   | (((((.....))))))                     | <i>fhlA</i> |
| <i>E. coli</i>    | OxyS   | <i>caiT</i> | 73 – 81   | 76 – 84     | (((((.....))))))                     | <i>fhlA</i> |
| <i>E. coli</i>    | RprA   | <i>paaC</i> | 67 – 96   | -37 – -14   | (((((.....(((.....)))))))))          | <i>rpoS</i> |
| <i>E. coli</i>    | RyhB   | <i>sdhC</i> | 48 – 60   | -161 – -149 | (((((.....(((.....)))))))))          | <i>cysE</i> |
| <i>E. coli</i>    | RyhB   | <i>yagV</i> | 77 – 85   | -397 – -389 | (((((.....(((.....)))))))))          | <i>sodB</i> |
| <i>E. coli</i>    | RyhB   | <i>yeaW</i> | 3 – 37    | -131 – -75  | (((((.....(((.....)))))))))          | <i>fur</i>  |
| <i>E. coli</i>    | RyhB   | <i>yicS</i> | 1 – 29    | -180 – -152 | (((((.....(((.....)))))))))          | <i>iscS</i> |
| <i>E. coli</i>    | RyhB   | <i>yigE</i> | 77 – 88   | -188 – -177 | (((((.....(((.....)))))))))          | <i>shiA</i> |
| <i>E. coli</i>    | SgrS   | <i>hlyE</i> | 66 – 79   | 43 – 56     | (((((.....(((.....)))))))))          | <i>manX</i> |
| <i>E. coli</i>    | SgrS   | <i>putP</i> | 64 – 83   | -121 – -102 | (((((.....(((.....)))))))))          | <i>ptsG</i> |
| <i>E. coli</i>    | Spot42 | <i>aat</i>  | 43 – 59   | -28 – -11   | (((((.....(((.....)))))))))          | <i>nanC</i> |
| <i>E. coli</i>    | Spot42 | <i>arnT</i> | 80 – 89   | -37 – -28   | (((((.....(((.....)))))))))          | <i>gltA</i> |
| <i>E. coli</i>    | Spot42 | <i>cynX</i> | 82 – 89   | 18 – 25     | (((((.....(((.....)))))))))          | <i>sthA</i> |
| <i>E. coli</i>    | Spot42 | <i>rhIE</i> | 65 – 106  | -40 – -1    | (((((.....(((.....)))))))))          | <i>galK</i> |
| <i>E. coli</i>    | Spot42 | <i>xylH</i> | 61 – 75   | -123 – -109 | (((((.....(((.....)))))))))          | <i>srlA</i> |
| <i>E. coli</i>    | Spot42 | <i>yggU</i> | 64 – 96   | 15 – 53     | (((((.....(((.....)))))))))          | <i>xylF</i> |
| <i>Salmonella</i> | ArcZ   | STM3651     | 92 – 116  | -125 – -105 | (((((.....(((.....)))))))))          | STM3216     |
| <i>Salmonella</i> | ArcZ   | <i>pduJ</i> | 73 – 82   | -178 – -168 | (((((.....(((.....)))))))))          | <i>sdaC</i> |
| <i>Salmonella</i> | ArcZ   | <i>purA</i> | 5 – 22    | 108 – 124   | (((((.....(((.....)))))))))          | <i>tpx</i>  |
| <i>Salmonella</i> | ChiX   | <i>atpB</i> | 4 – 24    | -177 – -157 | (((((.....(((.....)))))))))          | <i>chbC</i> |
| <i>Salmonella</i> | ChiX   | <i>ybaK</i> | 2 – 13    | -135 – -124 | (((((.....(((.....)))))))))          | <i>chiP</i> |
| <i>Salmonella</i> | CyaR   | STM1787     | 1 – 32    | -110 – -78  | (((((.....(((.....)))))))))          | <i>ompX</i> |

∞

Accessibility and conservation in sRNA-mRNA interactions

Richter and Backofen

(Continued)

| Organism          | sRNA | mRNA         | sRNA site | mRNA site   | Predicted non-functional interaction                    | True target |
|-------------------|------|--------------|-----------|-------------|---------------------------------------------------------|-------------|
| <i>Salmonella</i> | GcvB | STM1049      | 57 – 80   | -165 – -149 | ((((((((.....((((&))))))))))))))                        | <i>cycA</i> |
| <i>Salmonella</i> | GcvB | STM2598      | 49 – 60   | -169 – -158 | (((((((((&))))))))))                                    | <i>gltI</i> |
| <i>Salmonella</i> | GcvB | STM2768      | 20 – 37   | -142 – -126 | (((((.((((((((&))))))))))))))                           | <i>dppA</i> |
| <i>Salmonella</i> | GcvB | STM4002      | 49 – 65   | -159 – -144 | (((((.((((((((&))))))))))))))                           | <i>argT</i> |
| <i>Salmonella</i> | GcvB | STM4032.2N   | 36 – 60   | -20 – 4     | ((((((((.((((.((((((((&)))))))))))).))))))              | <i>livJ</i> |
| <i>Salmonella</i> | GcvB | STM4032.2N   | 37 – 61   | -21 – 3     | ((((((((.((((.((((((((&)))))))))))).))))))              | <i>oppA</i> |
| <i>Salmonella</i> | GcvB | <i>flgJ</i>  | 32 – 44   | -139 – -127 | ((((((((((((&))))))))))                                 | <i>livK</i> |
| <i>Salmonella</i> | GcvB | <i>rfaJ</i>  | 49 – 62   | -422 – -407 | (((((((((((.((&)).))))))))))                            | <i>cycA</i> |
| <i>Salmonella</i> | GcvB | <i>sspH2</i> | 40 – 50   | -112 – -101 | ((((((((((((&)).))))))))))                              | STM4351     |
| <i>Salmonella</i> | InvR | <i>dps</i>   | 50 – 59   | 63 – 72     | ((((((((((((&))))))))))                                 | <i>ompD</i> |
| <i>Salmonella</i> | MicA | STM0952      | 41 – 69   | -52 – -26   | (((((.((((((((((((((((.....((((&))))))))))))))))))...)) | <i>lamB</i> |
| <i>Salmonella</i> | MicC | <i>yaeH</i>  | 92 – 103  | 19 – 30     | ((((((((((((&))))))))))                                 | <i>ompD</i> |
| <i>Salmonella</i> | RybB | STM1632      | 32 – 40   | -40 – -32   | ((((((((((((&))))))))))                                 | <i>ompF</i> |
| <i>Salmonella</i> | RybB | STM1636      | 30 – 45   | -192 – -173 | ((((((((....(((((((&))))))))))))))                      | <i>tsx</i>  |
| <i>Salmonella</i> | RybB | STM3356      | 62 – 77   | 3 – 18      | (((((.((((((((((((((((.....))))))))))))))               | <i>ompN</i> |
| <i>Salmonella</i> | RybB | <i>pmrF</i>  | 66 – 79   | 60 – 73     | (((((....((((((((((&))))))))))                          | <i>ompS</i> |
| <i>Salmonella</i> | RybB | <i>pps</i>   | 19 – 28   | 69 – 79     | ((((((((((((&)).))))))))                                | <i>ompD</i> |
| <i>Salmonella</i> | RybB | <i>pyrG</i>  | 44 – 56   | 24 – 35     | ((((((((....(((&)).))))))))                             | <i>ompA</i> |
| <i>Salmonella</i> | RybB | <i>rstB</i>  | 65 – 74   | -78 – -69   | ((((((((((((&))))))))))                                 | <i>ompC</i> |
| <i>Salmonella</i> | RybB | <i>secF</i>  | 20 – 32   | 131 – 148   | ((((((((.((((((((&))))))))))))))                        | <i>ompW</i> |
| <i>Salmonella</i> | RybB | <i>stfC</i>  | 36 – 42   | 45 – 51     | ((((((((((((&))))))))))                                 | <i>chiP</i> |
| <i>Salmonella</i> | RybB | <i>wcaG</i>  | 32 – 40   | 44 – 52     | ((((((((((((&))))))))))                                 | <i>ompD</i> |
| <i>Salmonella</i> | RybB | <i>yabI</i>  | 45 – 52   | 92 – 99     | ((((((((((((&))))))))))                                 | <i>fadL</i> |

**Table S4:** Organisms used in this study and the respective NCBI RefSeq database genome accession numbers.<sup>29</sup>

| Organism                           | RefSeq genome accession number |
|------------------------------------|--------------------------------|
| <i>Citrobacter koseri</i>          | NC_009792                      |
| <i>Citrobacter rodentium</i>       | NC_013716                      |
| <i>Cronobacter sakazakii</i>       | NC_009778                      |
| <i>Enterobacter</i> sp. 638        | NC_009436                      |
| <i>Escherichia coli</i> K-12       | NC_000913                      |
| <i>Escherichia fergusonii</i>      | NC_011740                      |
| <i>Klebsiella pneumoniae</i>       | NC_009648                      |
| <i>Pectobacterium carotovorum</i>  | NC_012917                      |
| <i>Photobacterium luminescens</i>  | NC_005126                      |
| <i>Proteus mirabilis</i>           | NC_010554                      |
| <i>Salmonella</i> Typhimurium      | NC_003197                      |
| <i>Salmonella</i> Typhi            | NC_003198                      |
| <i>Serratia proteamaculans</i>     | NC_009832                      |
| <i>Shigella boydii</i>             | NC_007613                      |
| <i>Shigella dysenteriae</i>        | NC_007606                      |
| <i>Shigella flexneri</i>           | NC_004337                      |
| <i>Shigella sonnei</i>             | NC_007384                      |
| <i>Sodalis glossinidius</i>        | NC_007712                      |
| <i>Yersinia enterocolitica</i>     | NC_008800                      |
| <i>Yersinia pestis</i>             | NC_003143                      |
| <i>Yersinia pseudotuberculosis</i> | NC_006155                      |

## Supplementary Figures

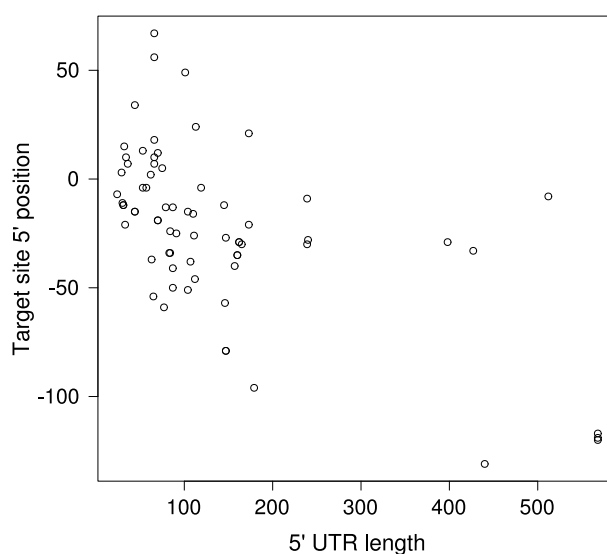

**Figure S1:** Positions of the 5' end of all target sites from *E. coli* and *Salmonella* vs. the lengths of the 5' UTR of the target genes. Target site positions are given as distance to the annotated translation start site. All genes that are located within an operon are excluded. Target site location and 5' UTR length show modest negative correlation (Spearman's correlation coefficient  $\rho = -0.54$ ).

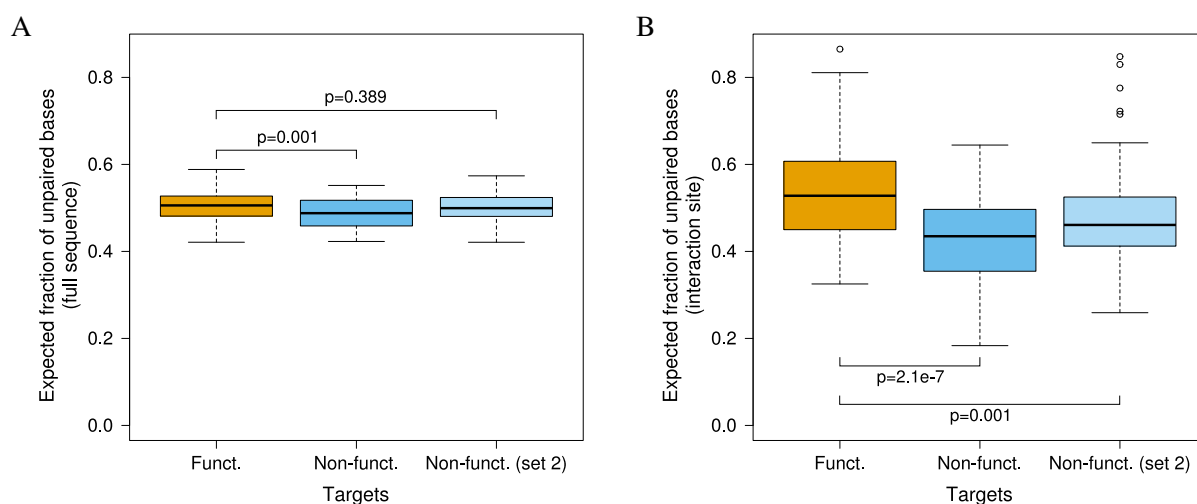

**Figure S2:** Comparison of target gene accessibility between a functional (orange) and two non-functional data sets (blue and light blue). The plots show the accessibility of (A) the full 5' UTR and 150 nt CDS sequence, and (B) the interaction site only, respectively. In non-functional data set 2 (light blue), each non-functional target was not selected by the interaction free energy, but by the overall accessibility, which had to be as similar as possible to the overall accessibility of the corresponding true target. For both negative data sets, the difference in mean accessibility between functional and non-functional targets is larger and much more significant for the interaction sites only than for the whole sequence. All  $p$ -values were calculated by Wilcoxon rank sum test.

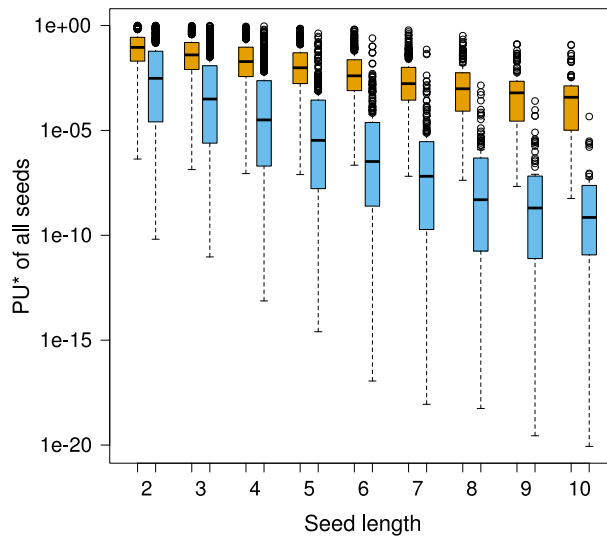

**Figure S3:** Comparison of the interaction site accessibility between functional (orange) and non-functional (blue) interactions. The plot shows the joint probability of being unpaired ( $PU^*$ ) of all interaction seeds, i.e., all perfectly matching sub-interactions, of length two to ten. Interaction seeds in the experimentally verified interactions are significantly more accessible than in the non-functional interactions ( $p < 4.8 \times 10^{-19}$  calculated by Wilcoxon rank sum test).

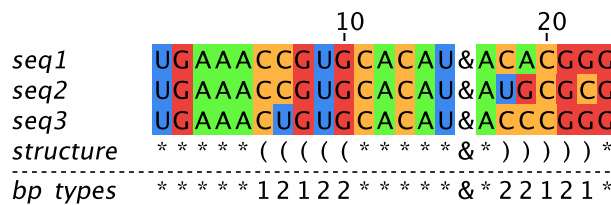

**Figure S4:** Schematic illustration of different interaction base pairings between two interacting RNAs. The sequence alignment shows two multiple RNA alignments concatenated by the linker symbol '&'. The structure contains round brackets indicating intermolecular base pairs between the two RNAs and stars indicating positions that do not participate in the interaction. The number of different interaction base pairings is given for each interaction position. For example, alignment columns 9 and 19 support the base pair U-A in *seq1* and G-U in *seq2*, whereas *seq3* contains a mismatch. Consequently, alignment columns 9 and 19 contain two different base pair combinations. The average number of different interaction base pair combinations is 1.6 in this example.

## Supplementary References

- [1] L. Argaman and S. Altuvia. *fhlA* repression by OxyS RNA: kissing complex formation at two sites results in a stable antisense-target RNA complex. *Journal of Molecular Biology*, 300(5):1101–12, 2000.
- [2] R. Balbontín, F. Fiorini, N. Figueroa-Bossi, J. Casadesús, and L. Bossi. Recognition of heptameric seed sequence underlies multi-target regulation by RybB small RNA in *Salmonella enterica*. *Mol Microbiol*, 78(2):380–94, 2010.
- [3] C. L. Beisel and G. Storz. The base-pairing RNA Spot 42 participates in a multioutput feedforward loop to help enact catabolite repression in *Escherichia coli*. *Mol Cell*, 41(3):286–97, 2011.
- [4] L. Bossi and N. Figueroa-Bossi. A small RNA downregulates LamB maltoporin in *Salmonella*. *Mol Microbiol*, 65(3):799–810, 2007.
- [5] M. Bouvier, C. M. Sharma, F. Mika, K. H. Nierhaus, and J. Vogel. Small RNA binding to 5' mRNA coding region inhibits translational initiation. *Mol Cell*, 32(6):827–37, 2008.
- [6] S. Chen, A. Zhang, L. B. Blyn, and G. Storz. MicC, a second small-RNA regulator of Omp protein expression in *Escherichia coli*. *J Bacteriol*, 186(20):6689–97, 2004.
- [7] A. Coornaert, A. Lu, P. Mandin, M. Springer, S. Gottesman, and M. Guillier. MicA sRNA links the PhoP regulon to cell envelope stress. *Mol Microbiol*, 76(2):467–79, 2010.
- [8] N. De Lay and S. Gottesman. The Crp-activated small noncoding regulatory RNA CyaR (RyeE) links nutritional status to group behavior. *J Bacteriol*, 191(2):461–76, 2009.
- [9] G. Desnoyers, A. Morissette, K. Prévost, and E. Massé. Small RNA-induced differential degradation of the polycistronic mRNA *iscRSUA*. *EMBO J*, 28(11):1551–61, 2009.
- [10] S. Durand and G. Storz. Reprogramming of anaerobic metabolism by the FnrS small RNA. *Mol Microbiol*, 75(5):1215–31, 2010.
- [11] N. Figueroa-Bossi, M. Valentini, L. Malleret, F. Fiorini, and L. Bossi. Caught at its own game: regulatory small RNA inactivated by an inducible transcript mimicking its target. *Genes Dev*, 23(17):2004–15, 2009.
- [12] T. A. Geissmann and D. Touati. Hfq, a new chaperoning role: binding to messenger RNA determines access for small RNA regulator. *EMBO J*, 23(2):396–405, 2004.
- [13] M. Guillier and S. Gottesman. The 5' end of two redundant sRNAs is involved in the regulation of multiple targets, including their own regulator. *Nucleic Acids Research*, 36(21):6781–94, 2008.
- [14] E. Holmqvist, J. Reimegård, M. Sterk, N. Grantcharova, U. Römling, and E. G. H. Wagner. Two antisense RNAs target the transcriptional regulator CsgD to inhibit curli synthesis. *EMBO J*, 29(11):1840–50, 2010.
- [15] H. Kawamoto, Y. Koide, T. Morita, and H. Aiba. Base-pairing requirement for RNA silencing by a bacterial small RNA and acceleration of duplex formation by Hfq. *Mol Microbiol*, 61(4):1013–22, 2006.
- [16] R. A. Lease, M. E. Cusick, and M. Belfort. Riboregulation in *Escherichia coli*: DsrA RNA acts by RNA:RNA interactions at multiple loci. *Proc Natl Acad Sci USA*, 95(21):12456–61, 1998.
- [17] N. Majdalani, C. Cuning, D. Sledjeski, T. Elliott, and S. Gottesman. DsrA RNA regulates translation of RpoS message by an anti-antisense mechanism, independent of its action as an antisilencer of transcription. *Proc Natl Acad Sci USA*, 95(21):12462–7, 1998.
- [18] N. Majdalani, D. Hernandez, and S. Gottesman. Regulation and mode of action of the second small RNA activator of RpoS translation, RprA. *Mol Microbiol*, 46(3):813–26, 2002.
- [19] P. Mandin and S. Gottesman. A genetic approach for finding small RNAs regulators of genes of interest identifies RybC as regulating the DpiA/DpiB two-component system. *Mol Microbiol*, 72(3):551–65, 2009.
- [20] P. Mandin and S. Gottesman. Integrating anaerobic/aerobic sensing and the general stress response through the ArcZ small RNA. *EMBO J*, 29(18):3094–107, 2010.
- [21] T. Møller, T. Franch, C. Udesen, K. Gerdes, and P. Valentin-Hansen. Spot 42 RNA mediates discoordinate expression of the *E. coli* galactose operon. *Genes Dev*, 16(13):1696–706, 2002.
- [22] M. Overgaard, J. Johansen, J. Møller-Jensen, and P. Valentin-Hansen. Switching off small RNA regulation with trap-mRNA. *Mol Microbiol*, 73(5):790–800, 2009.
- [23] K. Papenfort, M. Bouvier, F. Mika, C. M. Sharma, and J. Vogel. Evidence for an autonomous 5' target recognition domain in an Hfq-associated small RNA. *Proc Natl Acad Sci USA*, 107(47):20435–40, 2010.

- [24] K. Papenfort, V. Pfeiffer, S. Lucchini, A. Sonawane, J. C. D. Hinton, and J. Vogel. Systematic deletion of *Salmonella* small RNA genes identifies CyaR, a conserved CRP-dependent riboregulator of OmpX synthesis. *Mol Microbiol*, 68(4):890–906, 2008.
- [25] K. Papenfort, N. Said, T. Welsink, S. Lucchini, J. C. D. Hinton, and J. Vogel. Specific and pleiotropic patterns of mRNA regulation by ArcZ, a conserved, Hfq-dependent small RNA. *Mol Microbiol*, 74(1):139–58, 2009.
- [26] V. Pfeiffer, K. Papenfort, S. Lucchini, J. C. D. Hinton, and J. Vogel. Coding sequence targeting by MicC RNA reveals bacterial mRNA silencing downstream of translational initiation. *Nat Struct Mol Biol*, 16(8):840–6, 2009.
- [27] V. Pfeiffer, A. Sittka, R. Tomer, K. Tedin, V. Brinkmann, and J. Vogel. A small non-coding RNA of the invasion gene island (SPI-1) represses outer membrane protein synthesis from the *Salmonella* core genome. *Mol Microbiol*, 66(5):1174–91, 2007.
- [28] K. Prévost, H. Salvail, G. Desnoyers, J.-F. Jacques, É. Phaneuf, and E. Massé. The small RNA RyhB activates the translation of *shiA* mRNA encoding a permease of shikimate, a compound involved in siderophore synthesis. *Mol Microbiol*, 64(5):1260–73, 2007.
- [29] K. D. Pruitt, T. Tatusova, W. Klimke, and D. R. Maglott. NCBI Reference Sequences: current status, policy and new initiatives. *Nucleic Acids Research*, 37(Database issue):D32–6, 2009.
- [30] S. C. Pulvermacher, L. T. Stauffer, and G. V. Stauffer. The small RNA GcvB regulates *sstT* mRNA expression in *Escherichia coli*. *J Bacteriol*, 191(1):238–48, 2009.
- [31] A. A. Rasmussen, J. Johansen, J. S. Nielsen, M. Overgaard, B. Kallipolitis, and P. Valentin-Hansen. A conserved small RNA promotes silencing of the outer membrane protein YbfM. *Mol Microbiol*, 72(3):566–77, 2009.
- [32] J. B. Rice and C. K. Vanderpool. The small RNA SgrS controls sugar-phosphate accumulation by regulating multiple PTS genes. *Nucleic Acids Research*, 39(9):3806–19, 2011.
- [33] H. Salvail, P. Lanthier-Bourbonnais, J. M. Sobota, M. Caza, J.-A. M. Benjamin, M. E. S. Mendieta, F. Lépine, C. M. Dozois, J. Imlay, and E. Massé. A small RNA promotes siderophore production through transcriptional and metabolic remodeling. *Proc Natl Acad Sci USA*, 107(34):15223–8, 2010.
- [34] M. Schmidt, P. Zheng, and N. Delihias. Secondary structures of *Escherichia coli* antisense *micF* RNA, the 5'-end of the target *ompF* mRNA, and the RNA/RNA duplex. *Biochemistry*, 34(11):3621–31, 1995.
- [35] C. M. Sharma, F. Darfeuille, T. H. Plantinga, and J. Vogel. A small RNA regulates multiple ABC transporter mRNAs by targeting C/A-rich elements inside and upstream of ribosome-binding sites. *Genes Dev*, 21(21):2804–17, 2007.
- [36] C. M. Sharma, K. Papenfort, S. R. Pernitzsch, H.-J. Mollenkopf, J. C. D. Hinton, and J. Vogel. Pervasive post-transcriptional control of genes involved in amino acid metabolism by the Hfq-dependent GcvB small RNA. *Mol Microbiol*, 81(5):1144–65, 2011.
- [37] K. I. Udekwu, F. Darfeuille, J. Vogel, J. Reimegård, E. Holmqvist, and E. G. H. Wagner. Hfq-dependent regulation of OmpA synthesis is mediated by an antisense RNA. *Genes Dev*, 19(19):2355–66, 2005.
- [38] J. H. Urban and J. Vogel. Two seemingly homologous noncoding RNAs act hierarchically to activate *glmS* mRNA translation. *PLoS Biol*, 6(3):e64, 2008.
- [39] B. Večerek, I. Moll, and U. Bläsi. Control of Fur synthesis by the non-coding RNA RyhB and iron-responsive decoding. *EMBO J*, 26(4):965–75, 2007.
